# Supplementary material
Source: MDPI journal article supplement (https://www.mdpi.com/2073-4395/13/5/1183)
Supplement: s1 [file s1]

## Supplementary Materials

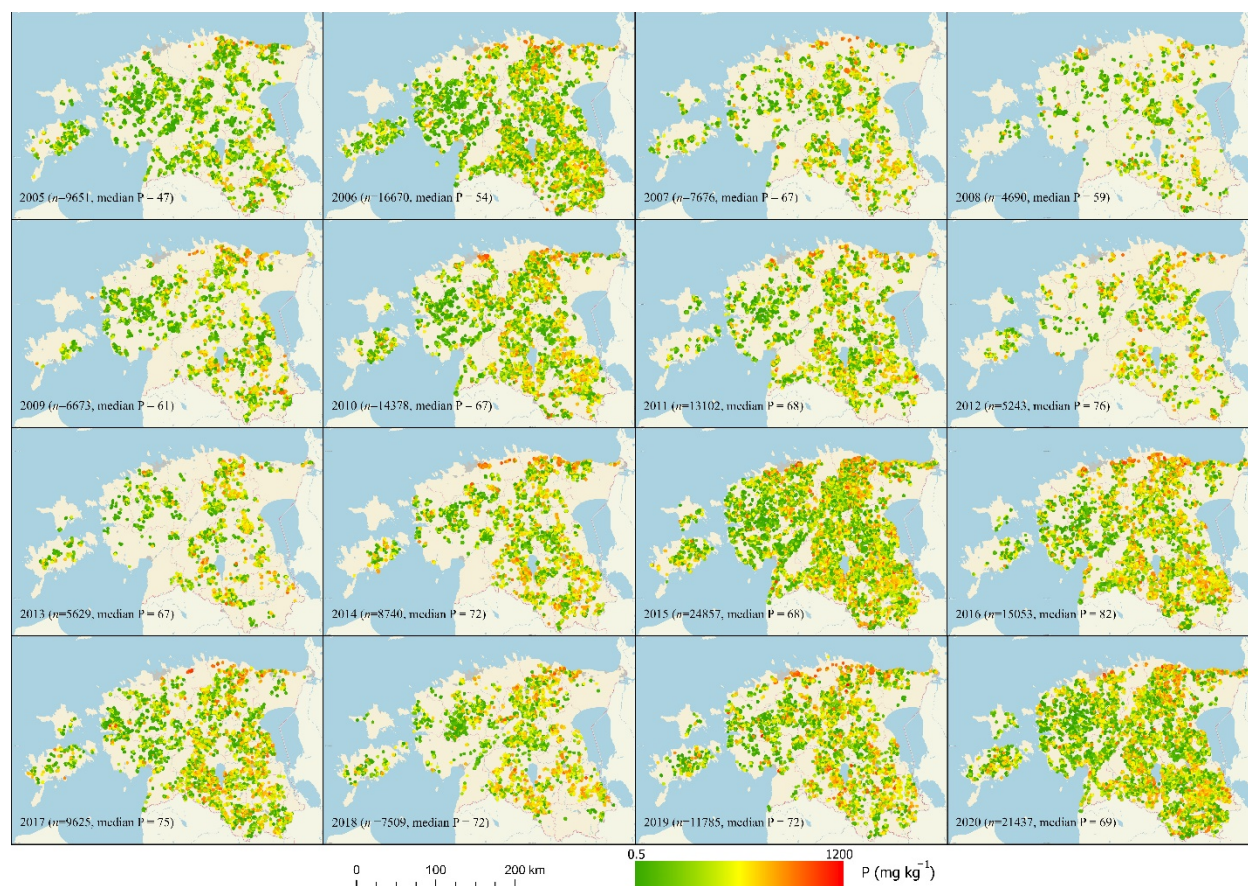

**Figure S1.** Topsoil plant-available  $p$  sample points taken from agricultural lands in 2005–2020. The count ( $n$ ) and median P value (mg/kg) are presented for every year. The color scale representing P value is the same for all years.

**Table S1.** Variables used in the bagging model. P is the predicted variable, and 32 variables were used to predict the P values. Index 1 after sand, silt, clay, rock, soc, bd, k, and awc indicates the upper soil layer (topsoil). Different statistics (mean, median, and standard deviation) of the topographic variables (TRI, TWI, LS, and SLP) were included in the bagging model.

| Variable | Description                                        | Database        | Method                                                                                                                         |
|----------|----------------------------------------------------|-----------------|--------------------------------------------------------------------------------------------------------------------------------|
| P        | Topsoil plant-available phosphorus content (mg/kg) | PANDA, 2021     | Measured, Mehlich-3 (M3) method used for P extraction.                                                                         |
| sand1    | Sand % (topsoil)                                   | EstSoil-EH [49] | Classified based on soil texture type.                                                                                         |
| silt1    | Silt % (topsoil)                                   | EstSoil-EH [49] | Classified based on soil texture type.                                                                                         |
| clay1    | Clay % (topsoil)                                   | EstSoil-EH [49] | Classified based on soil texture type.                                                                                         |
| rock1    | Rock % (topsoil)                                   | EstSoil-EH [49] | Classified based on soil texture type.                                                                                         |
| soc1     | Soil organic carbon % (topsoil)                    | EstSoil-EH [49] | Modeled by using statistical machine learning algorithms with the calculated topographic and land-use variables as predictors. |
| bd1      | Bulk density (g/cm <sup>3</sup> ) (topsoil)        | EstSoil-EH [49] | Calculated based on predicted SOC by using PTF-s.                                                                              |

|                          |                                                                                 |                                                                        |                                                                                                                                                    |
|--------------------------|---------------------------------------------------------------------------------|------------------------------------------------------------------------|----------------------------------------------------------------------------------------------------------------------------------------------------|
| k1                       | Saturated hydraulic conductivity (mm/h) (topsoil)                               | EstSoil-EH [49]                                                        | Modeled by using statistical machine learning algorithms by using soil texture variables as predictive variables [63].                             |
| awc1                     | Available water capacity (mm H <sub>2</sub> O per millimeter of soil) (topsoil) | EstSoil-EH [49]                                                        | Assimilated [64] based on EU-SoilHydroGrids 250 m resolution raster datasets [65].                                                                 |
| unit_area                | Area per mapped soil unit (sq m)                                                | EstSoil-EH [49]                                                        | Calculated based on the Estonian Soil Map                                                                                                          |
| tri_mean (stdev, median) | Terrain ruggedness index                                                        | EstSoil-EH [49]                                                        | Calculated from LiDAR DEM 5 m resolution [66]. Mean, median, and stdev calculated as zonal statistics per soil polygon.                            |
| twi_mean (stdev, median) | Topographic wetness index                                                       | EstSoil-EH [49]                                                        | Calculated from LiDAR DEM 5 m resolution [67]. Mean, median, and stdev calculated as zonal statistics per soil polygon.                            |
| slp_mean (stdev, median) | Slope (degrees)                                                                 | EstSoil-EH [49]                                                        | Calculated from LiDAR DEM 5 m resolution. Mean, median, and stdev calculated as zonal statistics per soil polygon.                                 |
| ls_mean (stdev, median)  | Slope length–steepness factor                                                   | EstSoil-EH [49]                                                        | Calculated from LiDAR DEM 5 m resolution [68]. Mean, median, and stdev calculated as zonal statistics per soil polygon.                            |
| area_drain               | Area under drainage (sq m)                                                      | EstSoil-EH [49]                                                        | Calculated based on Estonian Soil Map and official register of drainage systems by the Agricultural Board of Ministry of Rural Affairs of Estonia. |
| drain_pct                | Percentage of area under drainage                                               | EstSoil-EH [49]                                                        | Calculated based on Estonian Soil Map and official register of drainage systems by the Agricultural Board of Ministry of Rural Affairs of Estonia. |
| Longitude                | Longitude (m)                                                                   | Estonian Coordinate System of 1997 and EPSG 3301                       | Soil sampling location Y coordinate in case of P samples. Soil-land use polygon central point Y coordinate for prediction.                         |
| Latitude                 | Latitude (m)                                                                    | Estonian Coordinate System of 1997 and EPSG 3301                       | Soil sampling location X coordinate in case of P samples. Soil-land use polygon central point X coordinate for prediction.                         |
| Elevation                | Ground elevation (m)                                                            | LiDAR DEM 10 m resolution (Estonian Land Board, 2021)                  | Absolute height of soil sample location or absolute height of soil–land use polygon central point.                                                 |
| LU_MedP                  | Land-use category median P (mg/kg)                                              | ARIB, EELIS, and ETD (Estonian Land Board, 2021)                       | Classified based on land-use/land-cover intensity and fertilization, 8 classes.                                                                    |
| Soil_MedP                | Soil category median P (mg/kg)                                                  | Estonian Soil Map 1:10,000 (Estonian Land Board, 2021)                 | Classified based on soil-type properties, 29 classes.                                                                                              |
| NatSoil_MedP             | Soil category median P if land use is natural grassland (mg/kg)                 | EELIS, ETD, and Estonian Soil Map 1:10,000 (Estonian Land Board, 2021) | Classified based on soil-type properties, 29 classes.                                                                                              |
| Texture_MedP             | Soil texture category median P (mg/kg)                                          | Estonian Soil Map 1:10,000 (Estonian Land Board, 2021)                 | Classified based on soil-texture properties, 12 classes.                                                                                           |
| Parent_MedP              | Quaternary sediment category median P (mg/kg)                                   | Geological Base Map 1:400,000 (Estonian Land Board, 2020)              | Classified based on sediment deposition properties, 9 classes and anthropogenic soil class.                                                        |
| HydSoil_MedP             | Soil hydrologic group median P (mg/kg)                                          | Estonian Soil Map 1:10,000 (Estonian Land Board, 2021)                 | Classified based on soil moisture properties, 4 classes.                                                                                           |

References [49,63–68] are cited in the supplementary materials.
